# Supplementary material for: An Analysis of the Effect of Teacher's Behavior on Mathematics Anxiety and The Role of Intervention Programs
Source: Research Square preprint supplement (doi:10.21203/rs.3.rs-1849718/v1), 2022-08-04
Supplement: Supplementary file 1 [file 7f9c977b3ad89b83b7ba8410.docx]

# Appendices

**Questionnaire for Quantitative Research Study**

**Topic**: **An Analysis of the Effect of Teacher's Behavior on Mathematics Anxiety and The Role of Intervention Programs**

***Instruction:*** *Please fill or tick mark the following required information.*

**Section – A (Demographic or Personal Information)**

**1. Indicate your gender:**

- Male
- Female

**2. Indicate your age:**

- 18-25
- 26-30
- 31-40
- 41-60
- 61 and above

**3. State your highest completed level of** education:

- Bachelors degree
- Masters degree
- M.Phil
- Ph.D.

**4. Years of experience:**

- 0-5 years
- 5-10 years
- 10-15 years
- 15 year
- s and above

**Section B: Questionnaire**

***Teacher’s Behavior***

1. **My teacher is rigid about how the problem is to be solved.**

| Strongly Agree | Agree | Neutral | Disagree | Strongly Disagree |
| --- | --- | --- | --- | --- |

1. **My teacher is supportive and encouraging in the classroom.**

| Strongly Agree | Agree | Neutral | Disagree | Strongly Disagree |
| --- | --- | --- | --- | --- |

1. **My teacher favors some people or groups over others.**

| Strongly Agree | Agree | Neutral | Disagree | Strongly Disagree |
| --- | --- | --- | --- | --- |

1. **My teacher makes me feel like an able, valuable, and self-directed learner.**

| Strongly Agree | Agree | Neutral | Disagree | Strongly Disagree |
| --- | --- | --- | --- | --- |

1. **When it comes to anything serious I have felt ignored when talking to math teachers.**

| Strongly Agree | Agree | Neutral | Disagree | Strongly Disagree |
| --- | --- | --- | --- | --- |

1. **My teacher is rigid about how the problem is to be solved.**

| Strongly Agree | Agree | Neutral | Disagree | Strongly Disagree |
| --- | --- | --- | --- | --- |

1. **My teachers think advanced math is a waste of time for me.**

| Strongly Agree | Agree | Neutral | Disagree | Strongly Disagree |
| --- | --- | --- | --- | --- |

1. **Cooperative learning is one way students can lessen mathematic anxiety.**

| Strongly Agree | Agree | Neutral | Disagree | Strongly Disagree |
| --- | --- | --- | --- | --- |

1. **Encourage understanding not memorization can minimize mathematics anxiety.**

| Strongly Agree | Agree | Neutral | Disagree | Strongly Disagree |
| --- | --- | --- | --- | --- |

1. **Gameful learning can help in minimizing mathematic anxiety.**

| Strongly Agree | Agree | Neutral | Disagree | Strongly Disagree |
| --- | --- | --- | --- | --- |

1. **Asking follow-up questions that encourage and foster higher-level understanding is an effective way of reducing mathematic anxiety.**

| Strongly Agree | Agree | Neutral | Disagree | Strongly Disagree |
| --- | --- | --- | --- | --- |
